# Supplementary material for: Atrazine induced epigenetic transgenerational inheritance of disease, lean phenotype and sperm epimutation pathology biomarkers
Source: PLOS journal article supplement (doi:10.1371/journal.pone.0184306), 2017-09-20

(A) Estimated Agricultural Use for Atrazine, 2014

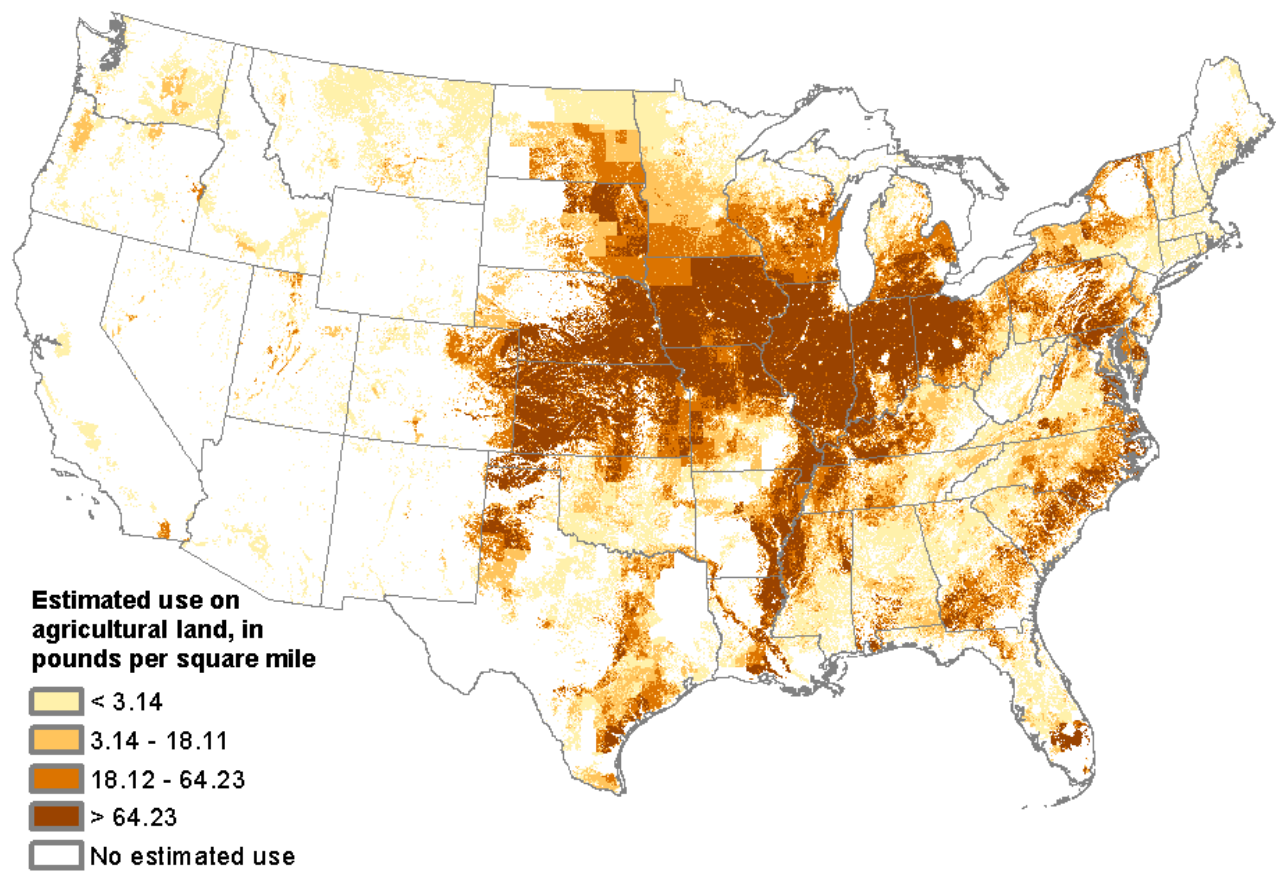

(B) Use by Year and Crop

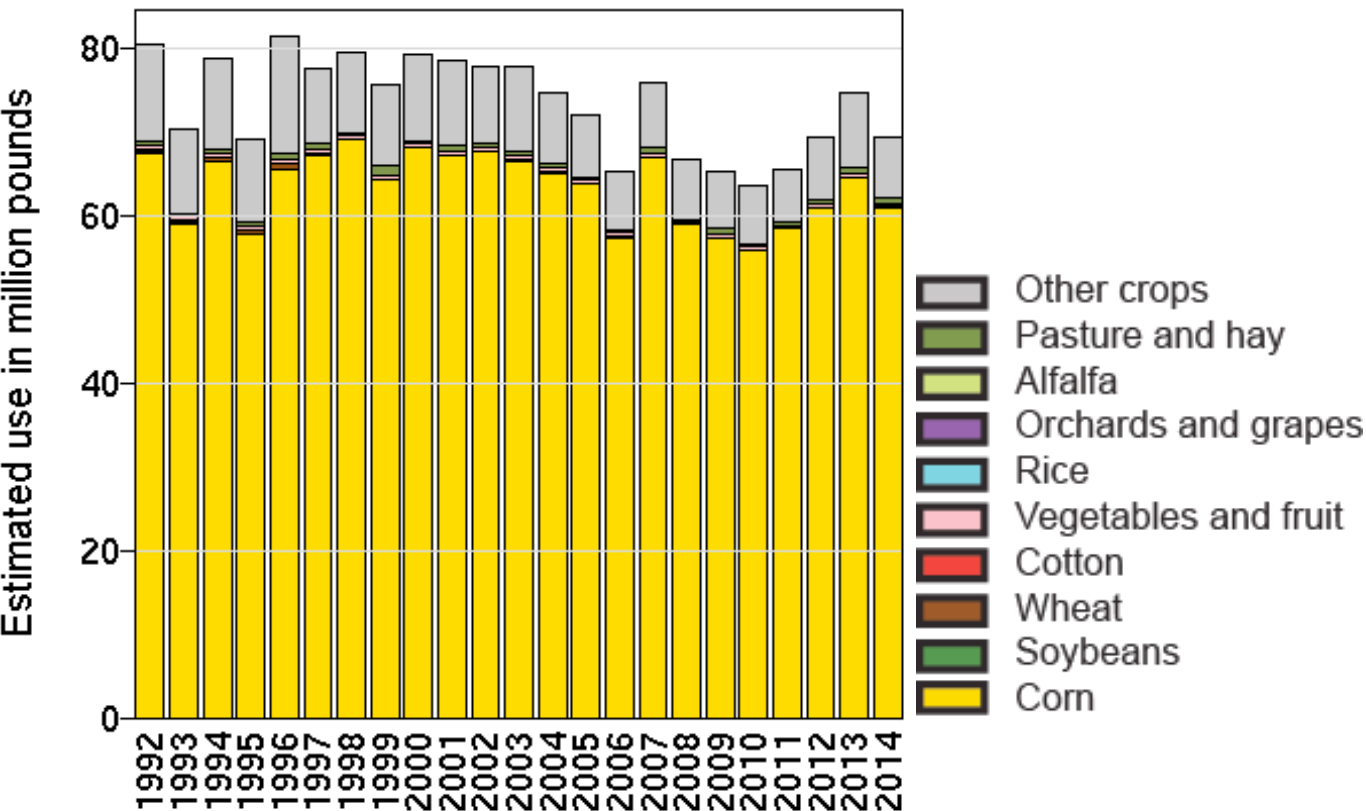

Supplement: S1 (10.1371/journal.pone.0184306.s001) [file journal.pone.0184306.s001]
