# Supplementary material for: Atrazine induced epigenetic transgenerational inheritance of disease, lean phenotype and sperm epimutation pathology biomarkers
Source: PLOS journal article supplement (doi:10.1371/journal.pone.0184306), 2017-09-20
Supplement: S2 (10.1371/journal.pone.0184306.s002) [file journal.pone.0184306.s002]

**(A)** F3 generation control lineage testis histology with normal (non-disease) seminiferous tubules

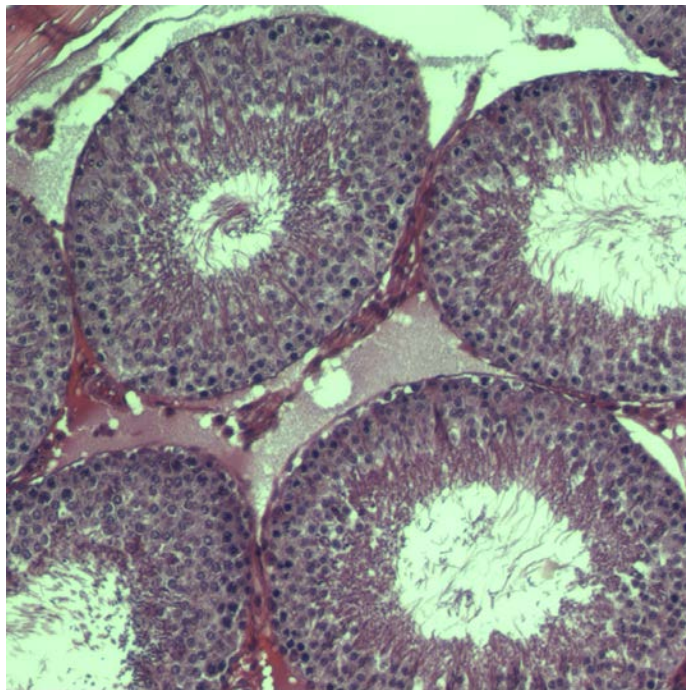

100 micrometers

**(B)** F3 generation atrazine lineage testis histology with seminiferous tubule atrophy and vacuoles

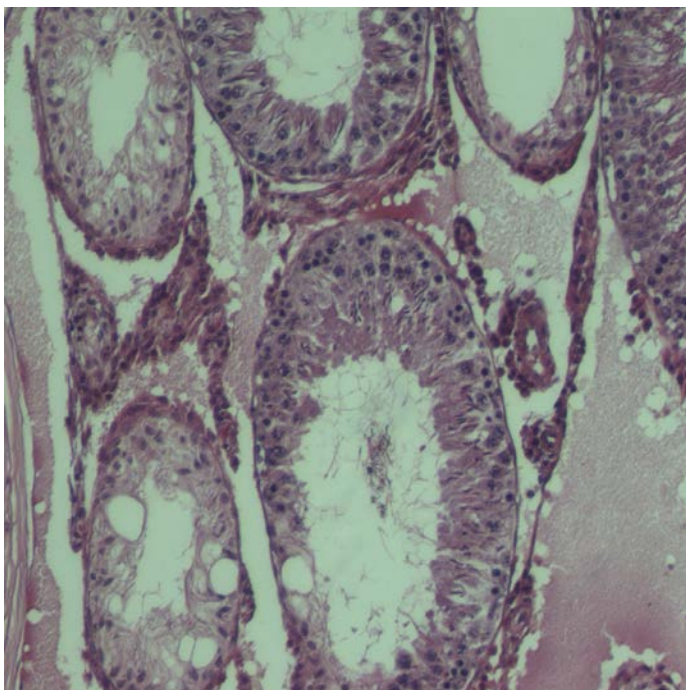

100 micrometers
