# Supplementary material for: Atrazine induced epigenetic transgenerational inheritance of disease, lean phenotype and sperm epimutation pathology biomarkers
Source: PLOS journal article supplement (doi:10.1371/journal.pone.0184306), 2017-09-20

**(A) F1 Generation Sperm DMR Increase or Decrease in DNA Methylation**

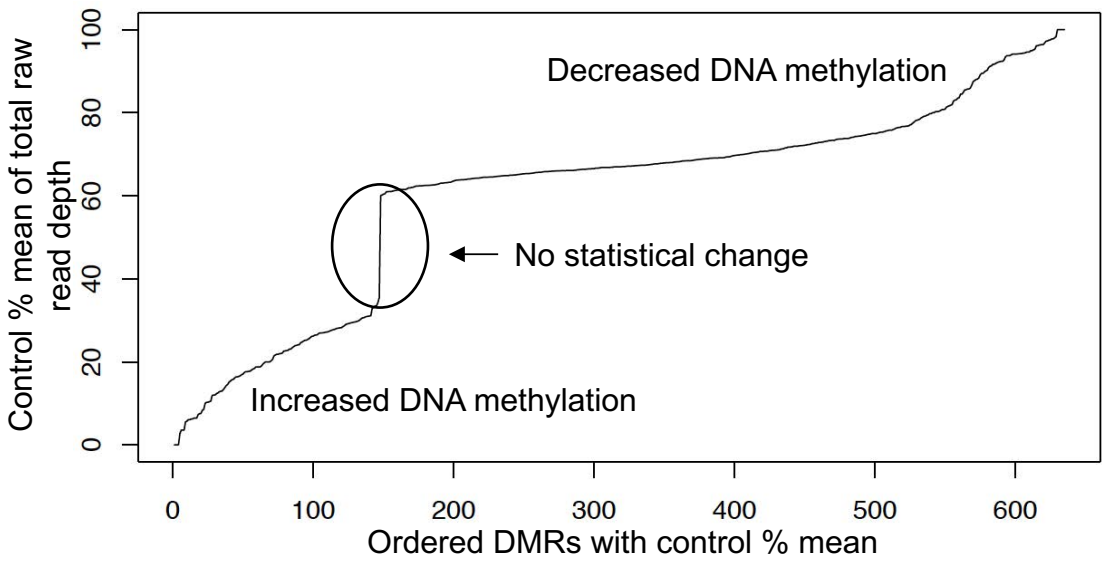

**(B) F2 Generation Sperm DMR Increase or Decrease in DNA Methylation**

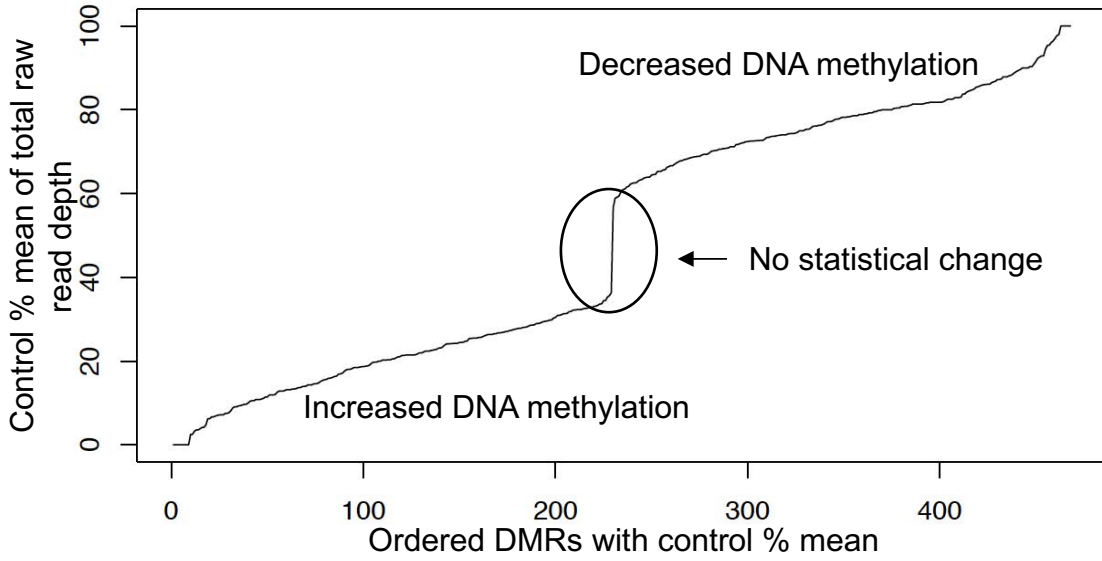

**(C) F3 Generation Sperm DMR Increase or Decrease in DNA Methylation**

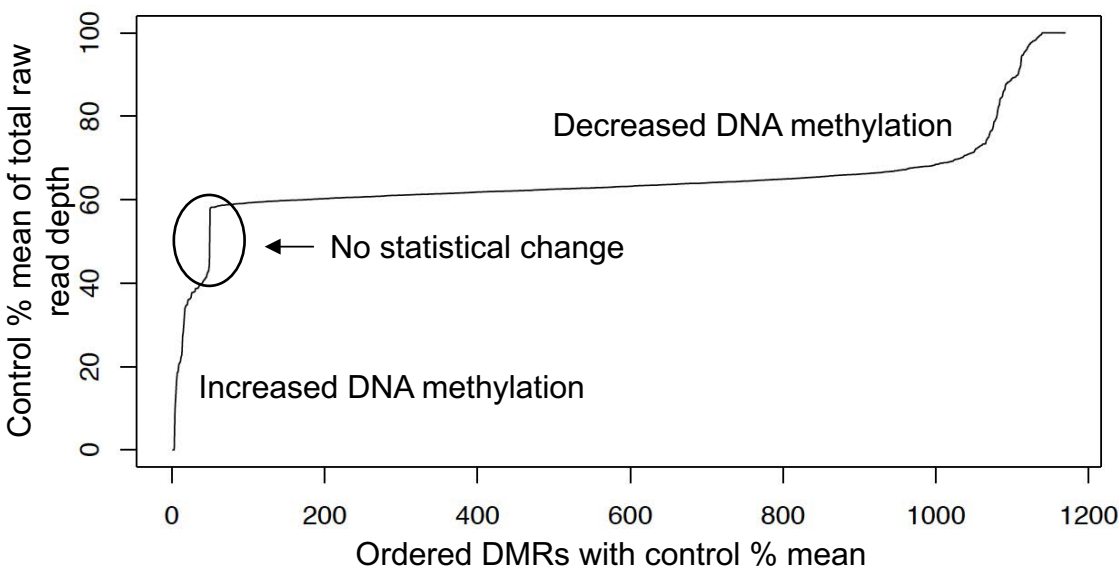

Supplement: S3 (10.1371/journal.pone.0184306.s003) [file journal.pone.0184306.s003]
