# Supplementary material for: Atrazine induced epigenetic transgenerational inheritance of disease, lean phenotype and sperm epimutation pathology biomarkers
Source: PLOS journal article supplement (doi:10.1371/journal.pone.0184306), 2017-09-20

Supplemental Figure S4. F1, F2, F3 Pathways in Cancer

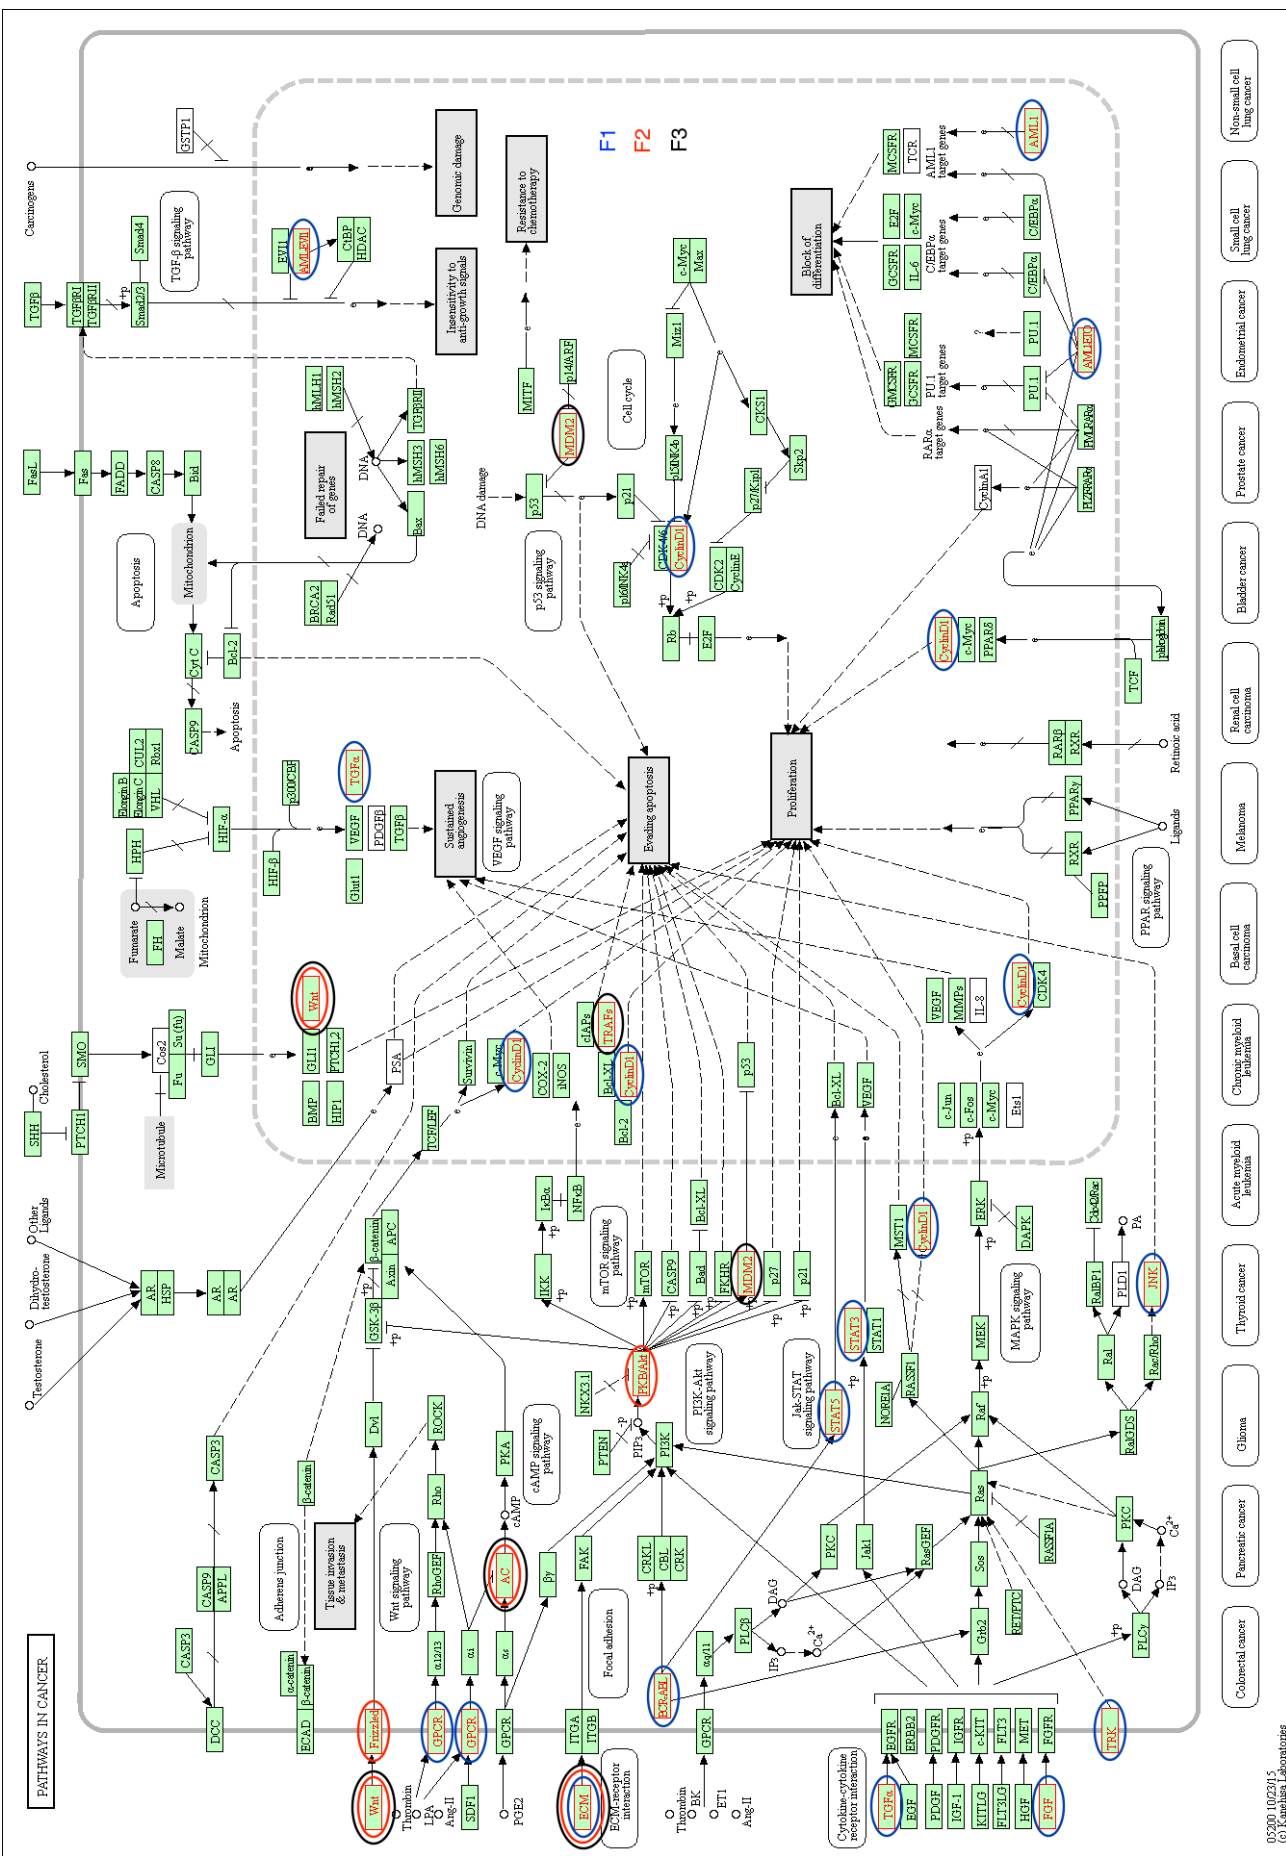

Supplement: S4 (10.1371/journal.pone.0184306.s004) [file journal.pone.0184306.s004]
