# Supplementary material for: Atrazine induced epigenetic transgenerational inheritance of disease, lean phenotype and sperm epimutation pathology biomarkers
Source: PLOS journal article supplement (doi:10.1371/journal.pone.0184306), 2017-09-20

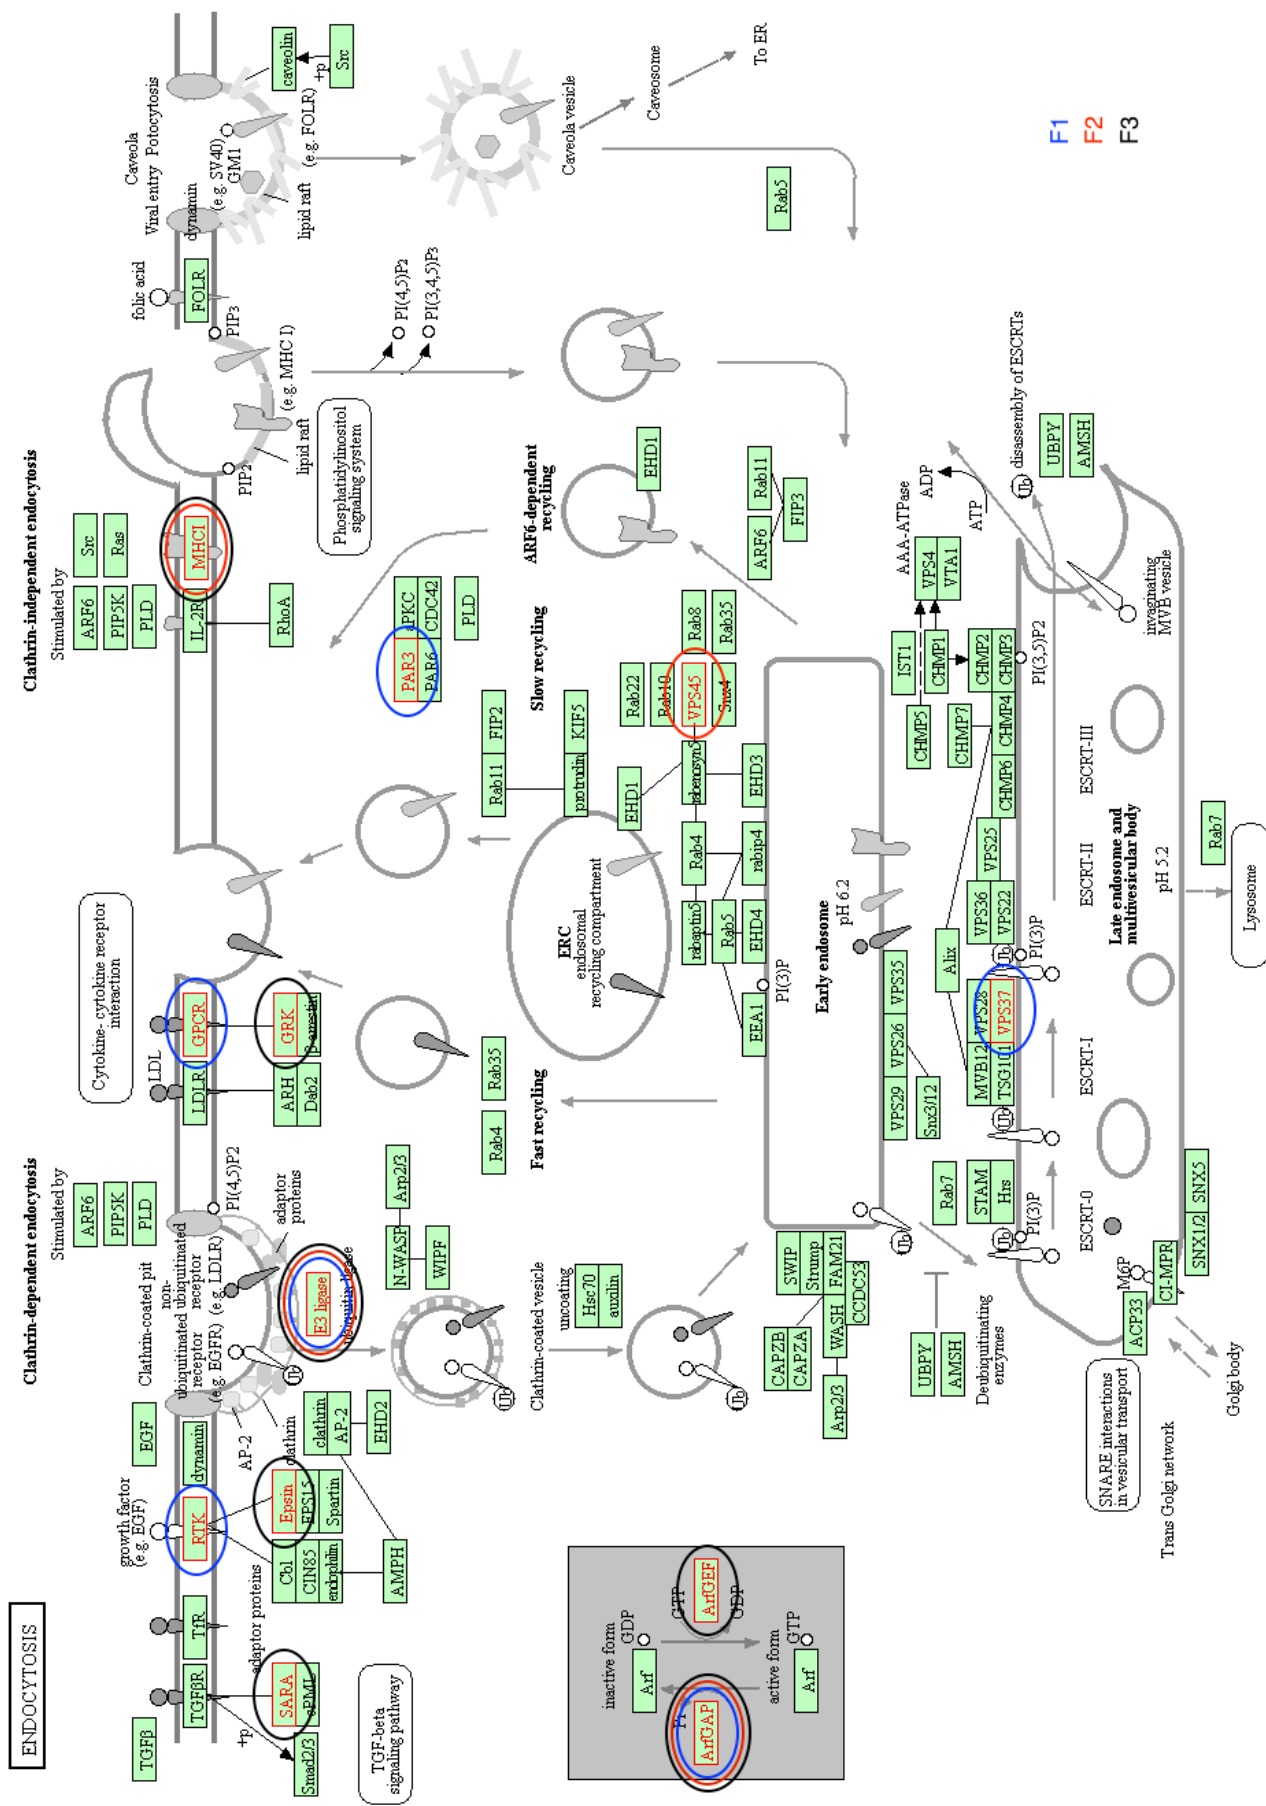

Supplement: S5 (10.1371/journal.pone.0184306.s005) [file journal.pone.0184306.s005]
