# Supplementary material for: Atrazine induced epigenetic transgenerational inheritance of disease, lean phenotype and sperm epimutation pathology biomarkers
Source: PLOS journal article supplement (doi:10.1371/journal.pone.0184306), 2017-09-20

(A) Non-Testis Disease DMR versus Testis Disease DMR Comparison

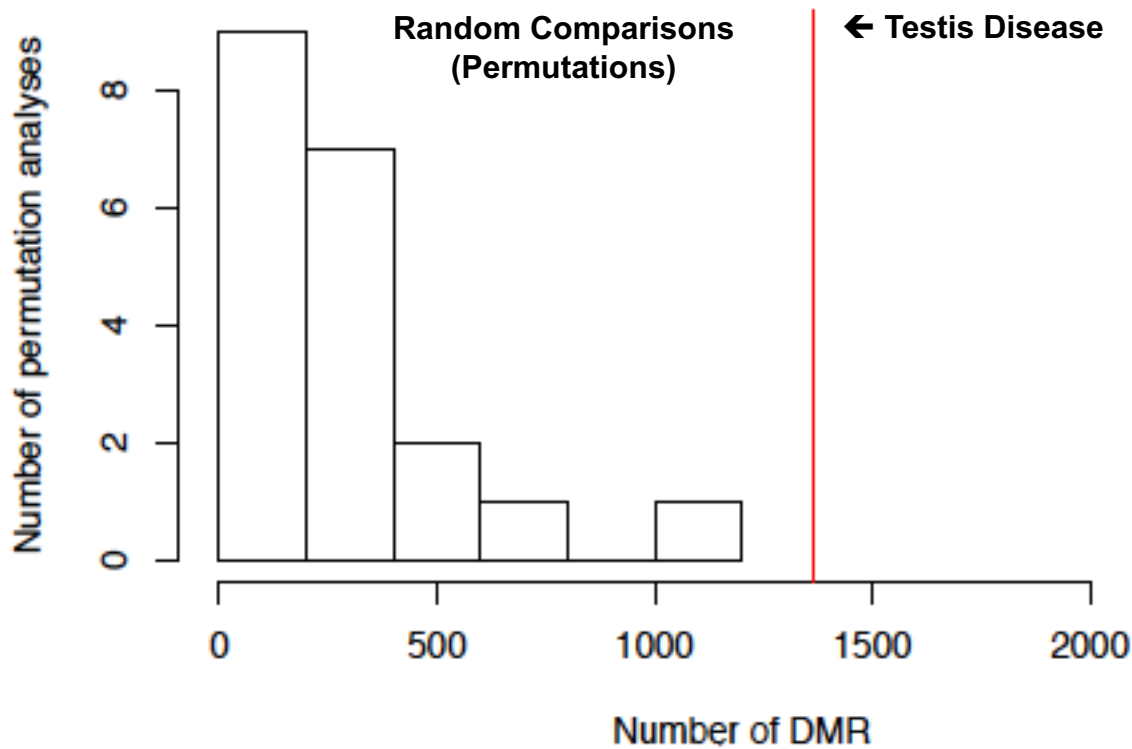

(B) Non-Lean versus Lean Phenotype DMR Comparison

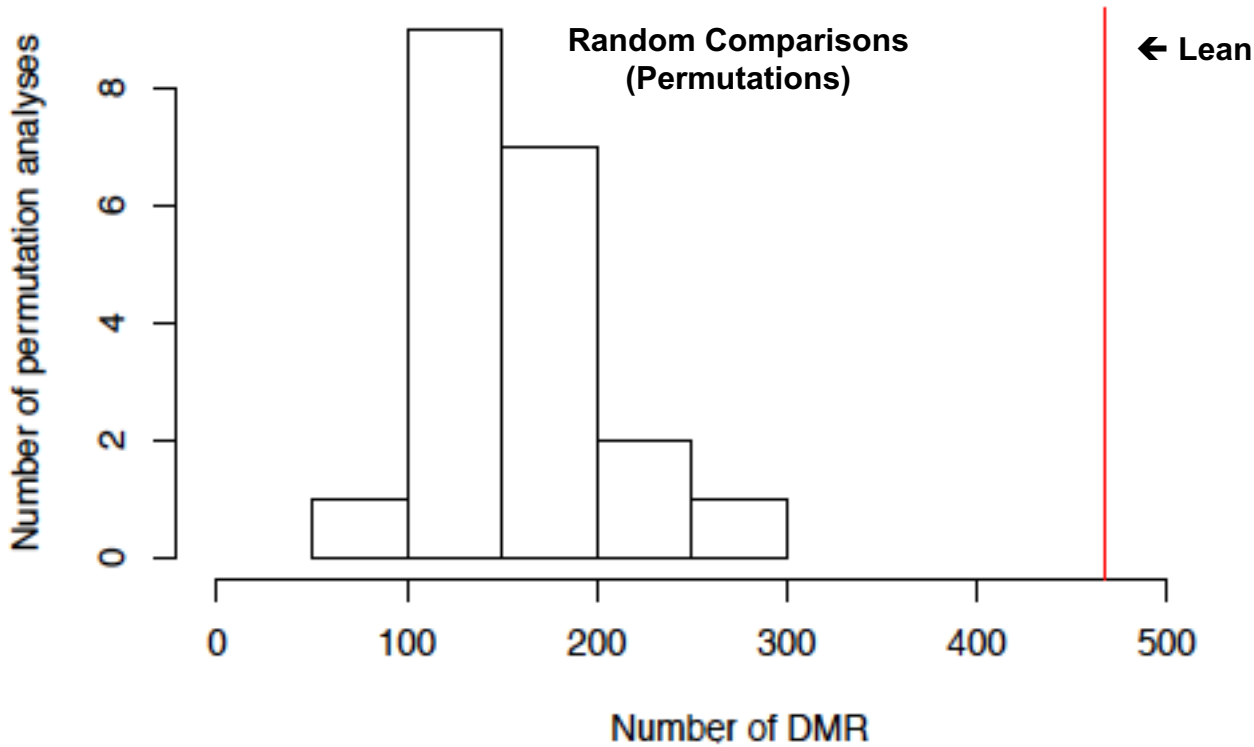

Supplement: S6 (10.1371/journal.pone.0184306.s006) [file journal.pone.0184306.s006]
